# Supplementary material for: Agronomic Practices in Lemon Balm Production under Temperate Climate Conditions: Raw Material Yield and Active Substances Content
Source: MDPI journal article supplement (doi:10.3390/agronomy13051433), 2023-05-22
Supplement: s1 [file s1]

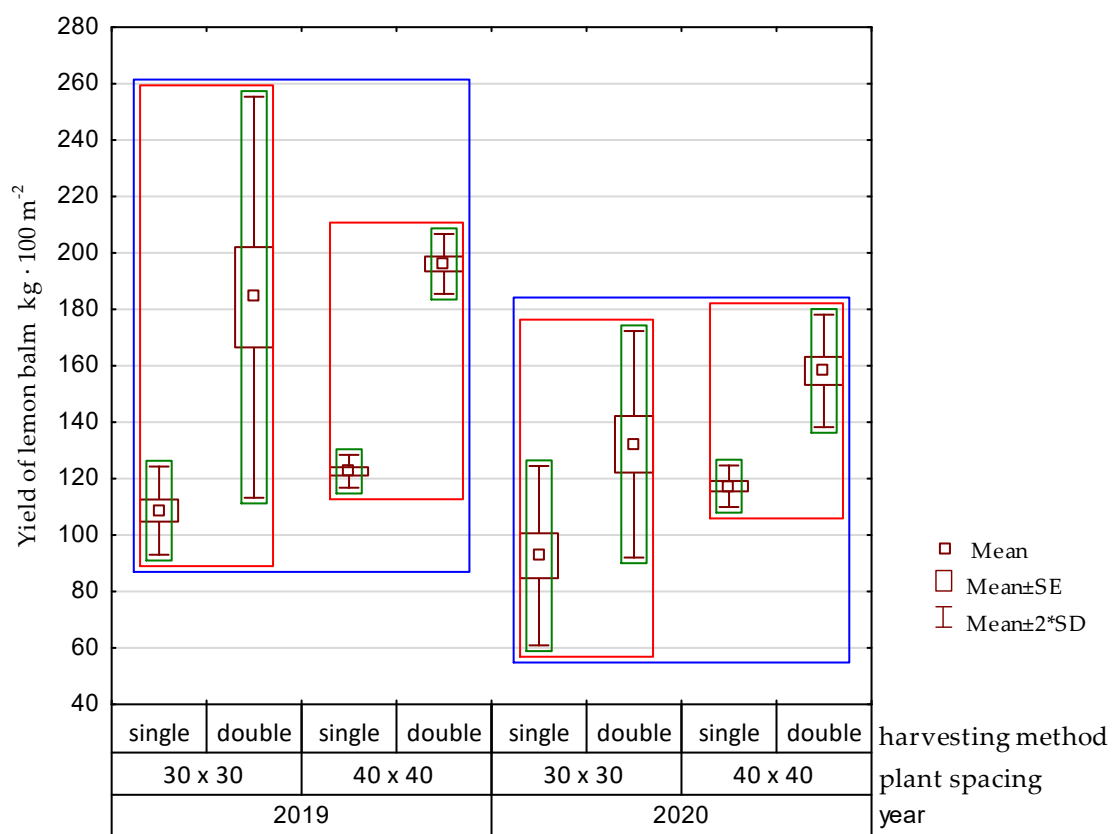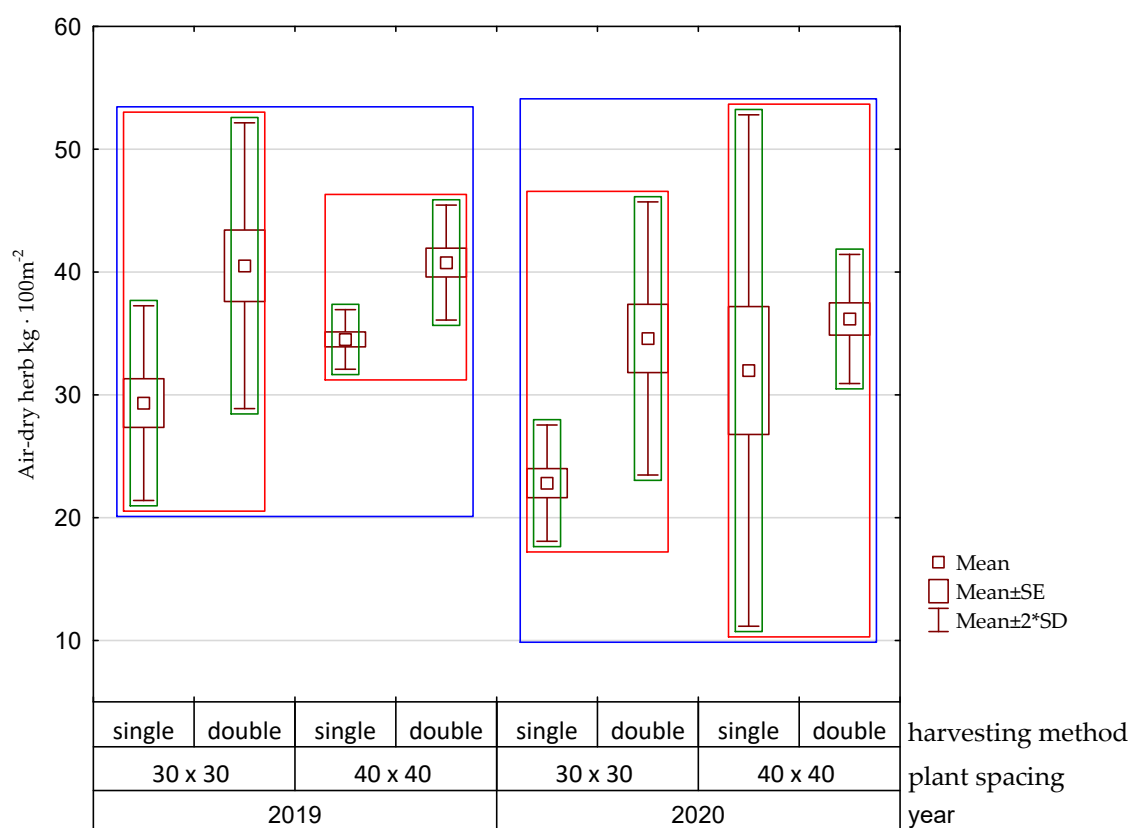

**Figure S1.** Lemon balm yield in different agrotechnical variants.

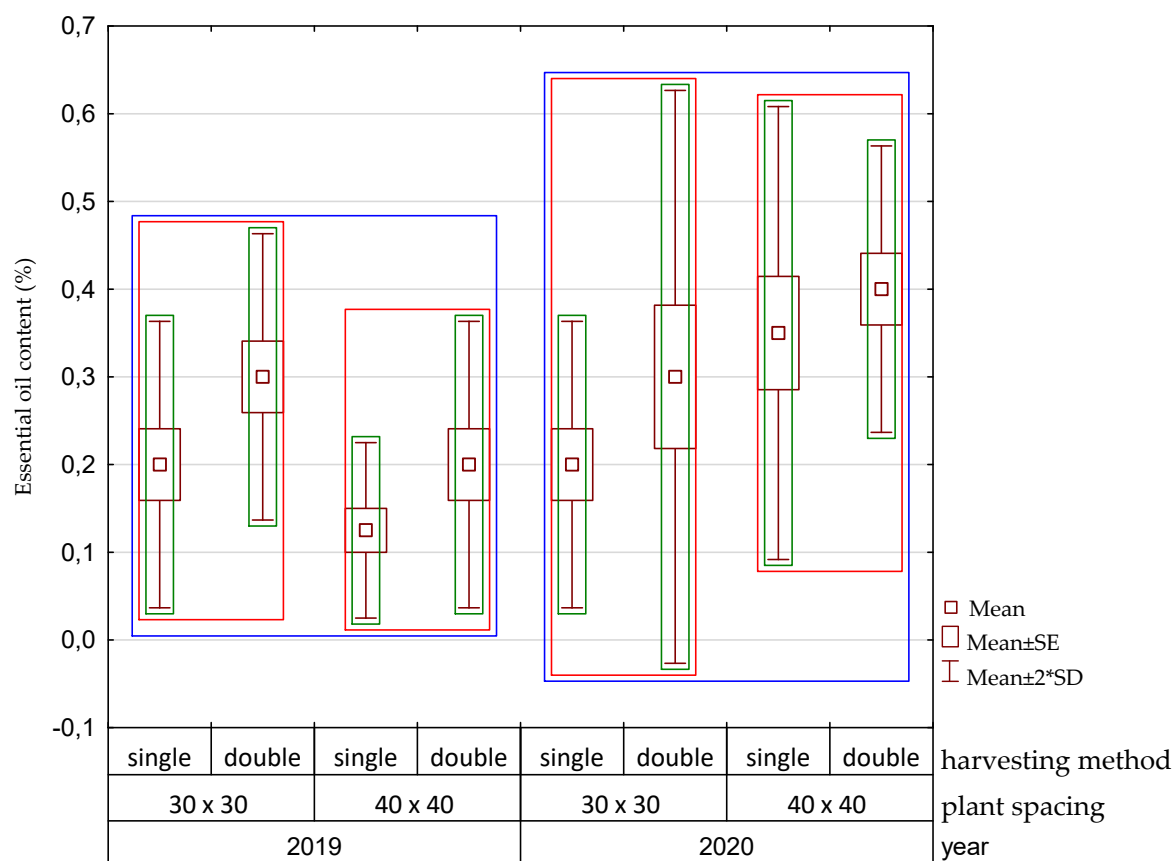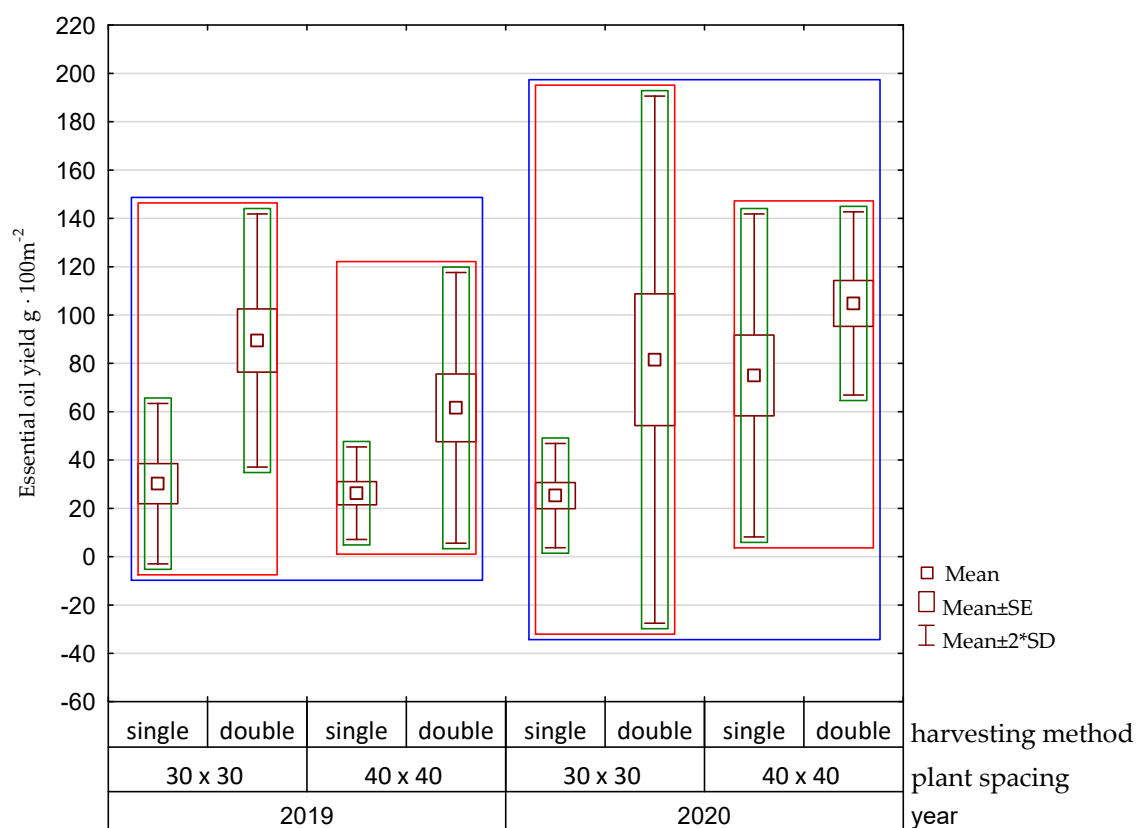

**Figure S2.** Essential oil content and yield of lemon balm.

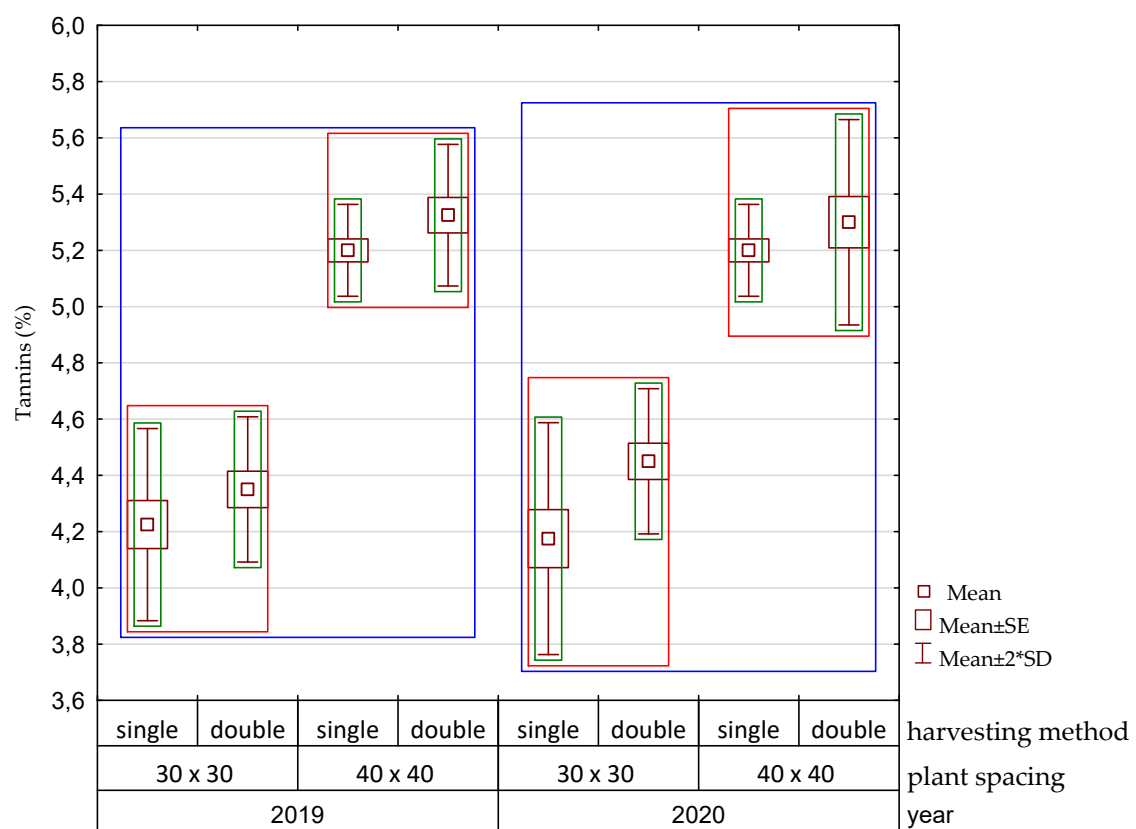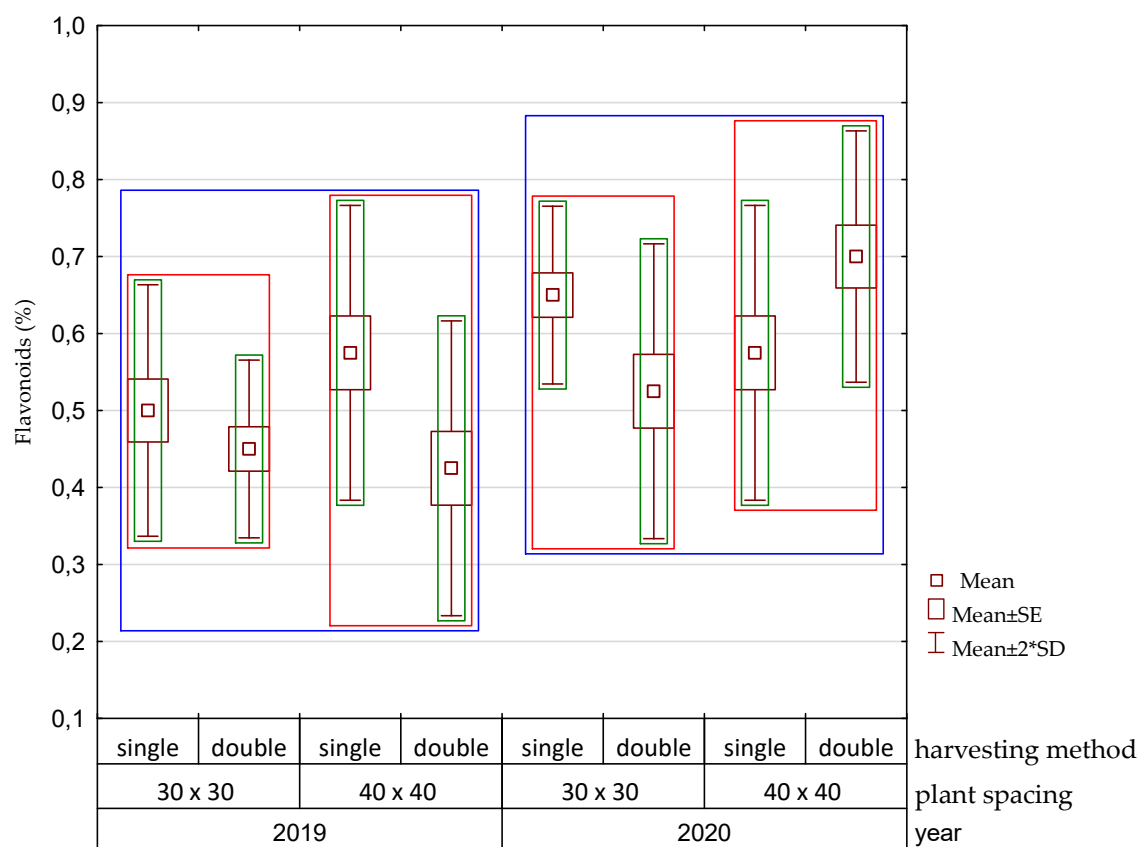

**Figure S3.** Active substances of lemon balm raw material.
